# Supplementary material for: Integrated downstream regulation by the quorum-sensing controlled transcription factors LrhA and RcsA impacts phenotypic outputs associated with virulence in the phytopathogen Pantoea stewartii subsp. stewartii
Source: PeerJ. 2017 Dec 6;5:e4145. doi: 10.7717/peerj.4145 (PMC5723134; doi:10.7717/peerj.4145)
Supplement: Data S1 [file peerj-05-4145-s005.xlsx]

## Sheet: Fig 1
	OD 0.5	Normalized Fluorescence			OD	Ave Fluorescense	RFU		PlrhA	RAW Fluorescenes
	WT1 0.45	5930	6239	6404	0.45	6191	13757.8		RM	598	616	616
	WT2 0.5	7681	7812	7502	0.5	7665	15330		WT2 0.5	8279	8428	8118
	WT3 0.54	7017	7705	7681	0.54	7467.67	13829		RM	609	621	637
	dL1 0.48	21005	22210	21199	0.48	21471.3	44731.9		d/cLs1 0.53	26783	30295	29388
	dL2 0.45	18696	19457	18498	0.45	18883.7	41963.7		d/cLs2 0.45	20133	22722	22333
	dL3 0.48	20435	20461	19114	0.48	20003.3	41673.6		d/cLs3 0.49	21355	25863	22220
	d/cL1 0.49	9063	10022	9392	0.49	9492.33	19372.1		WT1 0.45	6539	6860	7041
	d/cL2 0.46	9514	8972	8850	0.46	9112	19808.7		WT3 0.54	7626	8326	8318
	d/cL3 0.53	10279	11591	10604	0.53	10824.7	20423.9		RM	631	664	691
									dL1 0.48	21636	22874	21890
	OD 0.5	Ave RFU	SD	SE	ttest to WT	ttest to deletion			dL2 0.45	19327	20121	19189
wildtype	WT	14305.6	887.874	512.614		1.32742e-05			dL3 0.48	21066	21125	19805
dL	ΔlrhA	42789.8	1688.23	974.7	1.32742e-05				d/cL1 0.49	9694	10686	10083
d/cL	ΔlrhA/lrhA+	19868.2	528.417	305.082	0.000736163	2.33408e-05			d/cL2 0.46	10145	9636	9541
									d/cL3 0.53	10910	12255	11295
RM: the medium used

## Sheet: Fig 5
	Day	12		Average
	Date	Sun Jan 29		Date	12
ΔrcsA/rcsA+	1	2.5		WT	3.16667
ΔrcsA/rcsA+	2	4		ΔrcsA	1.5
ΔrcsA/rcsA+	3	3.5		ΔrcsA/rcsA+	3.53333
ΔrcsA/rcsA+	4	3		PBS	0.433333
ΔrcsA/rcsA+	5	3
ΔrcsA/rcsA+	6	2		SD
ΔrcsA/rcsA+	7	5		WT	0.938591
ΔrcsA/rcsA+	8	3.5		ΔrcsA	0.866025
ΔrcsA/rcsA+	9	4		ΔrcsA/rcsA+	0.743223
ΔrcsA/rcsA+	10	3.5		PBS	0.416905
ΔrcsA/rcsA+	11	3		SE
ΔrcsA/rcsA+	12	4		WT	0.242343
ΔrcsA/rcsA+	13	4		ΔrcsA	0.223607
ΔrcsA/rcsA+	14	4		ΔrcsA/rcsA+	0.191899
ΔrcsA/rcsA+	15	4		PBS	0.107644
WT	35	4		ttest
WT	36	2.5		WT
WT	37	3.5		ΔrcsA	2.38974e-05
WT	38	4		ΔrcsA/rcsA+	0.245527
WT	39	3		PBS	4.90938e-11
WT	40	3
WT	41	1
WT	42	2.5
WT	43	2.5
WT	44	3
WT	45	5
WT	46	2.5
WT	47	3.5
WT	48	3.5
WT	49	4
ΔrcsA	50	0
ΔrcsA	51	2
ΔrcsA	52	1.5
ΔrcsA	53	1
ΔrcsA	54	0.5
ΔrcsA	55	2
ΔrcsA	56	1
ΔrcsA	57	2
ΔrcsA	58	2.5
ΔrcsA	59	2
ΔrcsA	60	0.5
ΔrcsA	61	3
ΔrcsA	62	2
ΔrcsA	63	2
ΔrcsA	64	0.5
PBS	26	0
PBS	27	1
PBS	28	0.5
PBS	29	0.5
PBS	30	1
PBS	31	0.5
PBS	32	0.5
PBS	33	1
PBS	34	0.5
PBS	31	1
PBS	32	0
PBS	33	0
PBS	34	0
PBS	35	0
PBS	36	0

## Sheet: Fig S2
Strain	Plant number	Score day 12	Strain	Plant number	Score day 12	Strain	Plant number	Score day 12	Strain	Plant number	Score day 12	Strain	Plant number	Score day 12	Strain	Plant number	Score day 12	Strain	Plant number	Score day 12	Strain	Plant number	Score day 12	Strain	Plant number	Score day 12	Strain	Plant number	Score day 12
DC283	46	2.5	PBS	16	0	Δ5211-Δ5208	21	3	Δ5211	47	5	Δ5211/5211+	31	5	Δ5208	1	3	Δ5208/5208+	16	4.5	Δ0458-0459/0458-0459+	1	3	Δ0458-0459/0458+	31	3	Δ0458-0459	61	4.5
DC284	47	1.5	PBS	17	0	Δ5211-Δ5208	22	4	Δ5211	48	1.5	Δ5211/5211+	32	3.5	Δ5208	2	3.5	Δ5208/5208+	17	3	Δ0458-0459/0458-0459+	2	1	Δ0458-0459/0458+	32	3.5	Δ0458-0460	62	3.5
DC285	48	3	PBS	18	0	Δ5211-Δ5208	23	3.5	Δ5211	49	1.5	Δ5211/5211+	33	5	Δ5208	3	4	Δ5208/5208+	18	3	Δ0458-0459/0458-0459+	3	3.5	Δ0458-0459/0458+	33	3.5	Δ0458-0461	63	2.5
DC286	49	3	PBS	19	0	Δ5211-Δ5208	24	3.5	Δ5211	50	4	Δ5211/5211+	34	4.5	Δ5208	4	5	Δ5208/5208+	19	4.5	Δ0458-0459/0458-0459+	4	3	Δ0458-0459/0458+	34	4	Δ0458-0462	64	3.5
DC287	50	3	PBS	20	0	Δ5211-Δ5208	25	5	Δ5211	51	4	Δ5211/5211+	35	3.5	Δ5208	5	4.5	Δ5208/5208+	20	4	Δ0458-0459/0458-0459+	5	4	Δ0458-0459/0458+	35	3	Δ0458-0463	65	3
DC288	51	3.5	PBS	21	0	Δ5211-Δ5208	26	4	Δ5211	12	3	Δ5211/5211+	36	3.5	Δ5208	6	3.5	Δ5208/5208+	21	4.5	Δ0458-0459/0458-0459+	6	3	Δ0458-0459/0458+	36	2	Δ0458-0464	66	4.5
DC289	52	3.5	PBS	22	0	Δ5211-Δ5208	27	5	Δ5211	13	5	Δ5211/5211+	37	5	Δ5208	7	4.5	Δ5208/5208+	22	4	Δ0458-0459/0458-0459+	7	4	Δ0458-0459/0458+	37	3	Δ0458-0465	67	3.5
DC290	53	1.5	PBS	23	0	Δ5211-Δ5208	28	2.5	Δ5211	14	3	Δ5211/5211+	38	4	Δ5208	8	3.5	Δ5208/5208+	23	4	Δ0458-0459/0458-0459+	8	4	Δ0458-0459/0458+	38	3	Δ0458-0466	68	4
DC291	54	2	PBS	24	0	Δ5211-Δ5208	29	4	Δ5211	15	4	Δ5211/5211+	39	3	Δ5208	9	3.5	Δ5208/5208+	24	5	Δ0458-0459/0458-0459+	9	2	Δ0458-0459/0458+	39	3.5	Δ0458-0467	69	5
DC292	55	3.5	PBS	25	0	Δ5211-Δ5208	30	5	Δ5211	16	4	Δ5211/5211+	40	2	Δ5208	10	3.5	Δ5208/5208+	25	4	Δ0458-0459/0458-0459+	10	3	Δ0458-0459/0458+	40	4	Δ0458-0468	70	4.5
DC293	56	3.5	PBS	26	0	Δ5211-Δ5209	57	5	Δ5211	44	3	Δ5211/5211+	41	4	Δ5208	11	5	Δ5208/5208+	26	3.5	Δ0458-0459/0458-0459+	11	2.5	Δ0458-0459/0458+	41	5	Δ0458-0469	71	3.5
DC294	57	3.5	PBS	27	0	Δ5211-Δ5210	58	2.5	Δ5211	45	5	Δ5211/5211+	42	4	Δ5208	12	3	Δ5208/5208+	27	5	Δ0458-0459/0458-0459+	12	4	Δ0458-0459/0458+	42	4	Δ0458-0470	72	2
DC295	58	4	PBS	28	0	Δ5211-Δ5211	59	4	Δ5211	46	4.5	Δ5211/5211+	43	4	Δ5208	13	5	Δ5208/5208+	28	4	Δ0458-0459/0458-0459+	13	3	Δ0458-0459/0458+	43	1	Δ0458-0471	73	5
DC296	59	4	PBS	29	0	Δ5211-Δ5212	60	3	Δ5211	47	2	Δ5211/5211+	44	2.5	Δ5208	14	4	Δ5208/5208+	29	3.5	Δ0458-0459/0458-0459+	14	3	Δ0458-0459/0458+	44	2.5	Δ0458-0472	74	3
DC297	60	4.5	PBS	30	0	Δ5211-Δ5213	61	3.5	Δ5211	48	5	Δ5211/5211+	45	2.5	Δ5208	15	5	Δ5208/5208+	30	3	Δ0458-0459/0458-0459+	15	3	Δ0458-0459/0458+	45	3.5	Δ0458-0473	75	2.5
DC283	16	0.5	PBS	61	0	15			15			15			15			15			15			15			15
DC283	17	4	PBS	62	0
DC283	18	2.5	PBS	63	0
DC283	19	5	PBS	64	0
DC283	20	4	PBS	65	0				Average	n	SD	SE	p-value
DC283	31	0.5	PBS	43	0			DC283	3.28378	37	1.10893	0.182307
DC283	32	4	PBS	44	0			PBS	0.0333333	30	0.126854	0.0231603	3.7487e-24
DC283	33	5	PBS	45	0			Δ0458-0459	3.63333	15	0.934778	0.241359	0.287873
DC283	34	3	PBS	46	0.5			Δ0458-0459/0458+	3.23333	15	0.942388	0.243324	0.877625
DC283	35	4	PBS	4	0			Δ0458-0459/0458-0459+	3.06667	15	0.820859	0.211945	0.496871
DC283	36	2	PBS	5	0			Δ5208	4.03333	15	0.743223	0.191899	0.0201056
DC283	52	3	PBS	6	0			Δ5208/5208+	3.96667	15	0.667262	0.172286	0.0309958
DC283	53	3.5	PBS	36	0			Δ5211	3.63333	15	1.24595	0.321702	0.325044
DC283	54	4	PBS	37	0.5			Δ5211/5211+	3.73333	15	0.942388	0.243324	0.173996
DC283	55	3.5	PBS	38	0			Δ5211-Δ5208	3.83333	15	0.879664	0.227128	0.0934284
DC283	56	2.5	30
DC283	1	3.5
DC283	2	4
DC283	3	3
DC283	33	5
DC283	34	4
DC283	35	4.5
37
